# Supplementary material for: Impact of COVID-19 Lockdown on the Metabolic Control Parameters in Patients with Diabetes Mellitus: A Systematic Review and Meta-analysis
Source: Preprints.org preprint supplement (doi:10.20944/preprints202106.0342.v1), 2021-06-14
Supplement: Supplementary file 2 [file supplementary]

**SUPPLEMENTARY MATERIAL**

**Table 1** EPHPP (Effective Public Health Practice Project) quality assessment of included studies

| ***Author, publication year*** | ***Selection bias*** | ***Study design*** | ***Confounders*** | ***Blinding*** | ***Data collection method*** | ***Withdrawals and dropouts*** | ***Rating*** |
| --- | --- | --- | --- | --- | --- | --- | --- |
| Barchetta et al., 2020 | 1 | 2 | 3 | 2 | 1 | 1 | *Moderate* |
| Khare and Jindal, 2020 | 1 | 2 | 1 | 2 | 1 | 1 | *Strong* |
| Christoforidis et al., 2020 | 3 | 2 | 1 | 2 | 1 | 1 | *Moderate* |
| Al-agha et al., 2021 | 1 | 2 | 1 | 2 | 1 | 1 | *Strong* |
| Cotovad-Bellas et al., 2020 | 2 | 2 | 3 | 2 | 1 | 1 | *Moderate* |
| Mesa et al., 2020 | 1 | 2 | 2 | 2 | 1 | 1 | *Strong* |
| Dover et al., 2020 | 3 | 2 | 3 | 2 | 1 | 1 | *Weak* |
| Longo et al., 2020 | 2 | 2 | 3 | 2 | 1 | 1 | *Moderate* |
| Potier et al., 2021 | 1 | 2 | 2 | 2 | 1 | 1 | *Strong* |
| Vinals et al., 2020 | 1 | 2 | 2 | 2 | 1 | 1 | *Strong* |
| Brener et al., 2020 | 1 | 2 | 1 | 2 | 1 | 1 | *Strong* |
| Ruissen et al., 2021 | 1 | 2 | 1 | 2 | 1 | 1 | *Strong* |
| Tornese et al., 2020 | 2 | 2 | 3 | 2 | 1 | 1 | *Moderate* |
| Aragona et al., 2020 | 2 | 2 | 2 | 2 | 1 | 1 | *Strong* |
| Verma et al., 2020 | 2 | 2 | 1 | 3 | 2 | 2 | *Moderate* |
| Alaqeel et al., 2021 | 2 | 2 | 1 | 2 | 1 | 1 | *Strong* |
| Di Dalmazi et al., 2020 | 2 | 2 | 3 | 2 | 1 | 1 | *Moderate* |
| Parise et al., 2021 | 1 | 2 | 1 | 2 | 1 | 1 | *Strong* |
| Biancalana et al., 2020 | 2 | 2 | 1 | 2 | 1 | 1 | *Strong* |
| Karatas et al., 2021 | 1 | 2 | 1 | 2 | 2 | 1 | *Strong* |
| Bonora et al., 2020 | 2 | 2 | 3 | 2 | 1 | 1 | *Moderate* |
